SPRING 2016 | VOLUME 28 | NUMBER 2

The Journal of  
**Neuropsychiatry**  
and Clinical Neurosciences

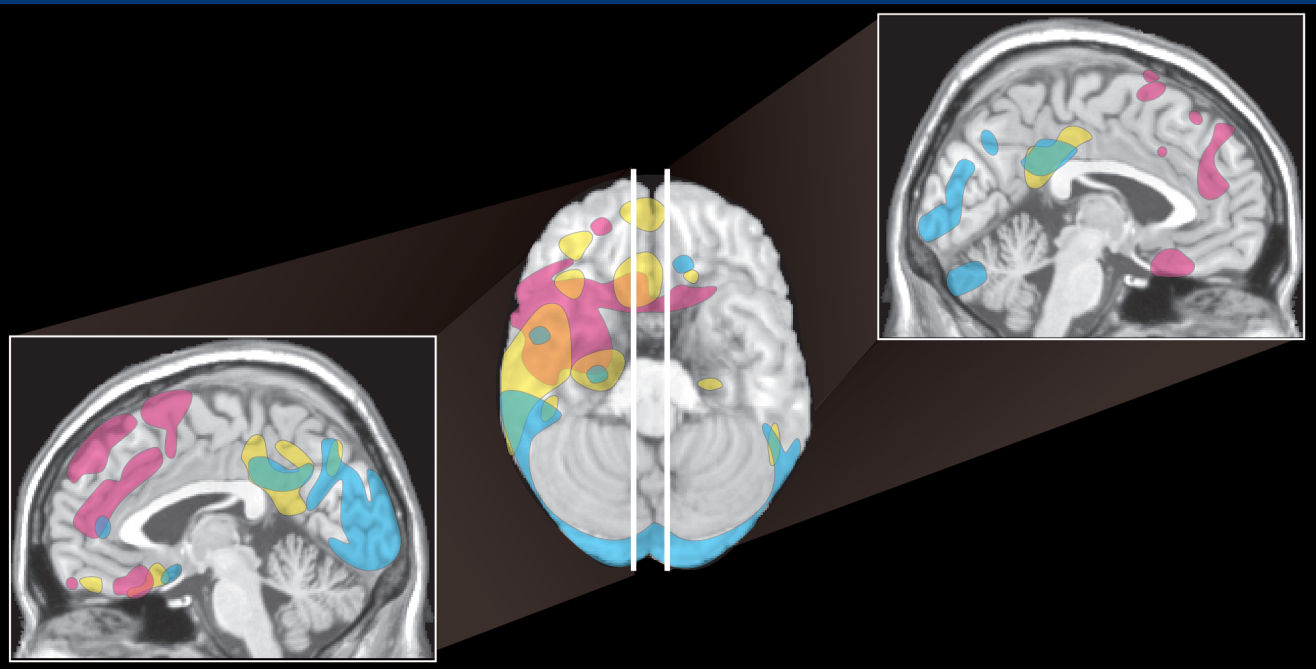

Preliminary Investigation of Cerebral Blood Flow and Amyloid Burden  
in Veterans With and Without Combat-Related Traumatic Brain Injury

Factors Impacting Functional Status in Veterans of Recent Conflicts With PTSD

A Diffusion Tensor Imaging Study Using a Voxel-Based Analysis,  
Region-of-Interest Method to Analyze White Matter Abnormalities in  
First-Episode, Treatment-Naïve Major Depressive Disorder

The Links Between Stress and Depression: Psychoneuroendocrinological,  
Genetic, and Environmental Interactions

Program of Enhanced Psychiatric Services for Patients With Brain Injury and  
Neuropsychiatric Disturbances: A Proposed Model of Care

Official Journal of the American Neuropsychiatric Association  
[neuro.psychiatryonline.org](http://neuro.psychiatryonline.org)
